# Supplementary material for: Estimation of the atmospheric hydroxyl radical oxidative capacity using multiple hydrofluorocarbons (HFCs)
Source: Copernicus journal article supplement (doi:10.5194/egusphere-2023-1917), 2023-08-30
Supplement: Supplementary file 1 [file egusphere-2023-1917-supplement.pdf]

## Supplementary Information

### Estimation of the atmospheric hydroxyl radical oxidative capacity using multiple hydrofluorocarbons (HFCs)

Rona L. Thompson<sup>1</sup>, Stephen A. Montzka<sup>2</sup>, Martin K. Vollmer<sup>3</sup>, Jgor Arduini<sup>4</sup>, Molly Crotwell<sup>2,5</sup>, Paul Krummel<sup>6</sup>, Chris Lunder<sup>1</sup>, Jens Mühle<sup>7</sup>, Simon O'Doherty<sup>8</sup>, Ronald G. Prinn<sup>9</sup>, Stefan Reimann<sup>3</sup>, Isaac Vimont<sup>2</sup>, Hsiang Wang<sup>10</sup>, Ray F. Weiss<sup>7</sup>, and Dickon Young<sup>8</sup>

<sup>1</sup>NILU - Norsk Institutt for Luftforskning, Kjeller, 2007, Norway

<sup>2</sup>NOAA, Earth System Research Laboratory, Boulder, CO, USA

<sup>3</sup>Empa, Swiss Federal Laboratories for Materials Science and Technologies, Switzerland

<sup>4</sup>Università degli Studi di Urbino, Chemical Sciences Section, Urbino, Italy

<sup>5</sup>Cooperative Institute for Research in Environmental Sciences, University of Colorado, Boulder, CO USA

<sup>6</sup>CSIRO Environment, Aspendale, Victoria, Australia

<sup>7</sup>Scripps Institution of Oceanography, University of California San Diego, La Jolla, CA, USA

<sup>8</sup>School of Chemistry, University of Bristol, UK

<sup>9</sup>Center for Global Change Science, Massachusetts Institute of Technology, Cambridge, MA, USA

<sup>10</sup>School of Earth and Atmospheric Sciences, Georgia Institute of Technology, GA, USA

#### Supplementary Tables

**Table S1:** Arrhenius rate constants for the five HFCs used in this study

| Species    | A                      | B    | Reference               |
|------------|------------------------|------|-------------------------|
| HFC-134a   | $1.5 \times 10^{-12}$  | 1750 | (Wilson, et al., 2007)  |
| HFC-152a   | $2.4 \times 10^{-12}$  | 1260 | (Wilson, et al., 2007)  |
| HFC-365mfc | $1.68 \times 10^{-12}$ | 1585 | (Mellouki et al., 1995) |
| HFC-245fa  | $6.32 \times 10^{-13}$ | 1331 | (Orkin et al., 1996)    |
| HFC-32     | $1.9 \times 10^{-12}$  | 1550 | (Wilson, et al., 2007)  |

**Table S2:** Sites used for the calculation of the mean for each latitudinal band. The species HFC-134a, HFC-152a, HFC-365mfc and HFC-32 are measured at all sites, but HFC-245fa is only measured at AGAGE sites. Note that the additional sites in the NOAA network, Harvard Forest, US (HFM) and Park Falls, US (LEF) were not included as observations at these sites are sensitive to local emissions and less representative of the well-mixed background. The altitude is given in metres above sea level.

| Site                   | Full name                  | Latitude | Longitude | Altitude | Network(s)           |
|------------------------|----------------------------|----------|-----------|----------|----------------------|
| <b>Box 1: 90°-30°N</b> |                            |          |           |          |                      |
| ALT                    | Alert, Canada              | 82.45    | -62.51    | 195      | NOAA                 |
| BRW                    | Barrow, Alaska, US         | 71.32    | -156.60   | 28       | NOAA, Archive        |
| MHD                    | Mace Head, Ireland         | 53.33    | -9.90     | 26       | NOAA, AGAGE          |
| NWR                    | Niwot Ridge, US            | 40.05    | -105.63   | 3526     | NOAA                 |
| SUM                    | Summit, Greenland          | 72.6     | -38.4     | 3200     | NOAA                 |
| THD                    | Trinidad Head, US          | 41.03    | -124.15   | 112      | NOAA, AGAGE, Archive |
| GSN                    | Gosan, Korea               | 33.28    | 127.17    | 72       | AGAGE                |
| JFJ                    | Jungfrauoch, Switzerland   | 46.55    | 7.99      | 3580     | AGAGE                |
| CMN                    | Monte Cimone, Italy        | 44.17    | 10.68     | 2165     | AGAGE                |
| ZEP                    | Zeppelin, Svalbard, Norway | 78.91    | 11.88     | 474      | AGAGE                |
| LJA                    | La Jolla, California, US   | 32.82    | -117.27   | 5        | Archive              |
| <b>Box 2: 30°N-0°</b>  |                            |          |           |          |                      |
| KUM                    | Cape Kumukahi, Hawaii, US  | 19.52    | -154.82   | 8        | NOAA                 |
| MLO                    | Mauna Loa, Hawaii, US      | 19.53    | -155.58   | 3437     | NOAA                 |
| RPB                    | Barbados                   | 13.17    | -59.43    | 45       | AGAGE                |
| <b>Box 3: 0°-30°S</b>  |                            |          |           |          |                      |
| SMO                    | American Samoa             | -14.25   | -170.57   | 60       | NOAA, AGAGE          |
| <b>Box 4: 30°-90°S</b> |                            |          |           |          |                      |
| CGO                    | Cape Grim, Australia       | -40.68   | 144.68    | 164      | NOAA, AGAGE, Archive |
| PSA                    | Palmer Station, Antarctica | -64.60   | -64.0     | 10       | NOAA                 |
| SPO                    | South Pole, Antarctica     | -89.98   | -24.80    | 2821     | NOAA                 |

**Table S3:** Start of the atmospheric record (within the inversion period 2000-2021) for each site in the NOAA and AGAGE networks and the Archive data.

| Network | Site     | HFC-134a | HFC-152a | HFC-365mfc | HFC-245fa | HFC-32 |
|---------|----------|----------|----------|------------|-----------|--------|
| NOAA    | ALT      | 2000.1   | 2000.6   | 2009.6     | NA        | 2014.8 |
|         | BRW      | 2000.1   | 2000.7   | 2009.7     | NA        | 2009.3 |
|         | CGO      | 2000.1   | 2000.6   | 2009.7     | NA        | 2009.3 |
|         | KUM      | 2000.1   | 2000.7   | 2009.7     | NA        | 2009.3 |
|         | MHD      | 2001.4   | 2001.4   | 2009.7     | NA        | 2015.0 |
|         | MLO      | 2000.1   | 2000.7   | 2009.7     | NA        | 2009.3 |
|         | NWR      | 2000.1   | 2000.7   | 2009.7     | NA        | 2014.9 |
|         | PSA      | 2000.1   | 2000.4   | 2009.3     | NA        | 2014.6 |
|         | SMO      | 2000.1   | 2000.7   | 2009.6     | NA        | 2009.3 |
|         | SPO      | 2000.1   | 2000.1   | 2009.2     | NA        | 2008.8 |
|         | SUM      | 2004.5   | 2004.5   | 2009.5     | NA        | 2014.8 |
|         | THD      | 2002.2   | 2002.2   | 2009.7     | NA        | 2009.3 |
| AGAGE   | RPB      | 2005.4   | 2005.4   | 2006.4     | 2008.0    | 2005.4 |
|         | GSN      | 2007.9   | 2007.9   | NA         | NA        | NA     |
|         | JFJ      | 2000.1   | 2000.1   | 2008.3     | 2004.7    | 2008.3 |
|         | MHD      | 2000.1   | 2000.1   | 2005.1     | 2006.9    | 2005.1 |
|         | CMN      | 2002.1   | 2002.1   | NA         | NA        | NA     |
|         | SMO      | 2006.4   | 2006.4   | 2006.4     | 2007.9    | 2006.4 |
|         | CGO      | 2000.1   | 2000.1   | 2005.4     | 2006.5    | 2005.1 |
|         | THD      | 2005.3   | 2005.3   | 2005.4     | 2008.0    | 2005.3 |
|         | ZEP      | 2001.1   | 2001.1   | 2010.8     | 2010.8    | 2010.8 |
| ARCHIVE | 90°-30°N | NA       | NA       | 2000.3     | 2000.3    | NA     |
|         | 30°-90°S | NA       | NA       | 2000.3     | 2000.3    | NA     |

**Table S4:** Calibration scales for each species and network

| Species    | AGAGE  | NOAA      |
|------------|--------|-----------|
| HFC-134a   | SIO-05 | NOAA-1995 |
| HFC-152a   | SIO-05 | NOAA-2004 |
| HFC-365mfc | SIO-14 | NOAA-2011 |
| HFC-245fa  | SIO-14 | N/A       |
| HFC-32     | SIO-07 | NOAA-2016 |

**Table S4:** Annual mean OH anomalies (%) from the mean estimates for inversions using i) adjustments made to the AGAGE data to match NOAA, ii) adjustments made to NOAA data to match AGAGE, and iii) inversions that included the very short-lived species HFC-152a and HFC-32.

| <b>Year</b> | <b>adjusted AGAGE</b> | <b>adjusted NOAA</b> | <b>incl. HFC-32 &amp; HFC-152a</b> |
|-------------|-----------------------|----------------------|------------------------------------|
| 2004        | 0.04                  | 0.12                 | 0.26                               |
| 2005        | -0.54                 | -0.49                | -0.61                              |
| 2006        | -0.40                 | -0.39                | -0.17                              |
| 2007        | -0.43                 | -0.40                | -0.10                              |
| 2008        | -0.64                 | -0.59                | -0.77                              |
| 2009        | 1.05                  | 1.03                 | 1.40                               |
| 2010        | 0.70                  | 0.78                 | 0.82                               |
| 2011        | 0.07                  | 0.18                 | 0.14                               |
| 2012        | 0.13                  | 0.22                 | 0.32                               |
| 2013        | 0.58                  | 0.60                 | 0.79                               |
| 2014        | 0.54                  | 0.55                 | 0.78                               |
| 2015        | -0.18                 | -0.17                | -0.19                              |
| 2016        | -0.44                 | -0.53                | -0.40                              |
| 2017        | -0.36                 | -0.54                | -0.46                              |
| 2018        | -1.09                 | -1.23                | -1.57                              |
| 2019        | -0.41                 | -0.65                | -1.05                              |
| 2020        | -0.30                 | -0.51                | -1.63                              |
| 2021        | 0.43                  | 0.36                 | -0.16                              |

**Table S5:** Sites in the NOAA discrete sampling network used for the calculation of the mean CH<sub>4</sub> mole fraction in each latitudinal band. The altitude is given in metres above sea level.

| Site                   | Full name                            | Latitude | Longitude | Altitude |
|------------------------|--------------------------------------|----------|-----------|----------|
| <b>Box 1: 90°-30°N</b> |                                      |          |           |          |
| ALT                    | Alert, Canada                        | 82.45    | -62.51    | 185      |
| ZEP                    | Zeppelin, Swalbard, Norway           | 78.91    | 11.89     | 474      |
| SUM                    | Summit, Greenland                    | 72.60    | -38.42    | 3209.54  |
| BRW                    | Barrow, Alaska, US                   | 71.32    | -156.61   | 11       |
| PAL                    | Pallas, Finland                      | 67.97    | 24.12     | 565      |
| ICE                    | Iceland                              | 63.40    | -20.29    | 118      |
| CBA                    | Cold Bay, Alaska, US                 | 55.21    | -162.72   | 21.34    |
| MHD                    | Mace Head, Ireland                   | 53.33    | -9.90     | 5        |
| SHM                    | Shemya Island, Alaska, US            | 52.71    | 174.13    | 23       |
| HUN                    | Hegyhatsal, Hungary                  | 46.95    | 16.65     | 248      |
| UUM                    | Ulaan Uul, Mongolia                  | 44.45    | 111.10    | 1007     |
| THD                    | Trinidad Head, CA, US                | 41.05    | -124.15   | 107      |
| NWR                    | Niwot Ridge, CO, US                  | 40.05    | -105.59   | 3523     |
| UTA                    | Wendover, Utah, US                   | 39.90    | -113.72   | 1327     |
| AZR                    | Azores, Portugal                     | 38.77    | -27.38    | 19       |
| TAP                    | Tae-ahn Peninsula, Korea             | 36.74    | 126.13    | 16       |
| WLG                    | Mt Waliguan, China                   | 36.29    | 100.90    | 3810     |
| BMW                    | Tudor Hill, Bermuda, UK              | 32.26    | -64.88    | 30       |
| <b>Box 2: 30°N-0°</b>  |                                      |          |           |          |
| WIS                    | Weizman Institute of Science, Israel | 29.96    | 35.06     | 151      |
| IZO                    | Izana, Tenerife, Spain               | 28.31    | -16.50    | 2372.9   |
| MID                    | Midway Island, US                    | 28.22    | -177.37   | 4.6      |
| KEY                    | Key Biscayne, FO, US                 | 25.67    | -80.16    | 1        |
| ASK                    | Assekrem, Algeria                    | 23.26    | 5.63      | 2710     |
| KUM                    | Cape Kumukahi, Hawaii, US            | 19.56    | -154.89   | 8        |
| MLO                    | Mauna Loa, Hawaii, US                | 19.54    | -155.58   | 3397     |
| GMI                    | Mariana Islands, Guam                | 13.39    | 144.66    | 0        |
| RPB                    | Ragged Point, Barbados               | 13.17    | -59.43    | 15       |
| CHR                    | Christmas Island, Kiribati           | 1.70     | -157.15   | 0        |
| <b>Box 3: 0°-30°S</b>  |                                      |          |           |          |
| SEY                    | Mahi, Seychelles                     | -4.68    | 55.53     | 2        |
| ASC                    | Ascension Island, UK                 | -7.97    | -14.40    | 85       |
| SMO                    | American Samoa                       | -14.25   | -170.56   | 42       |
| NMB                    | Gobabeb, Namibia                     | -23.58   | 15.03     | 456      |
| EIC                    | Easter Island                        | -27.16   | -109.43   | 47       |

**Table S5.** Continued

| <b>Box 3: 30°-90°S</b> |                                  |        |        |      |
|------------------------|----------------------------------|--------|--------|------|
| CPT                    | Cape Point, South Africa         | -34.35 | 18.49  | 230  |
| CGO                    | Cape Grim, Australia             | -40.68 | 144.69 | 94   |
| BHD                    | Baring Head, New Zealand         | -41.41 | 174.87 | 85   |
| CRZ                    | Crozet Island, France            | -46.43 | 51.85  | 197  |
| USH                    | Ushuaia, Argentina               | -54.85 | -68.31 | 12   |
| PSA                    | Palmer Station, Antarctica, US   | -64.77 | -64.05 | 10   |
| SYO                    | Syowa Station, Antarctica, Japan | -69.01 | 39.59  | 14   |
| HBA                    | Halley Station, Antarctica, UK   | -75.61 | -26.21 | 30   |
| SPO                    | South Pole, Antarctica, US       | -89.98 | -24.80 | 2810 |

## Supplementary Figures

**Figure S1:** Comparison of the AGAGE and NOAA measurements of HFC-32 (upper panel) and HFC-365mfc (lower panel) before and after adjustment. In each panel the top row shows the unadjusted and adjusted NOAA observations and the AGAGE observations, and the lower panel shows the difference between NOAA and AGAGE with and without adjustment. The adjustment was calculated as a quadratic function fit to the differences between the NOAA and AGAGE records.

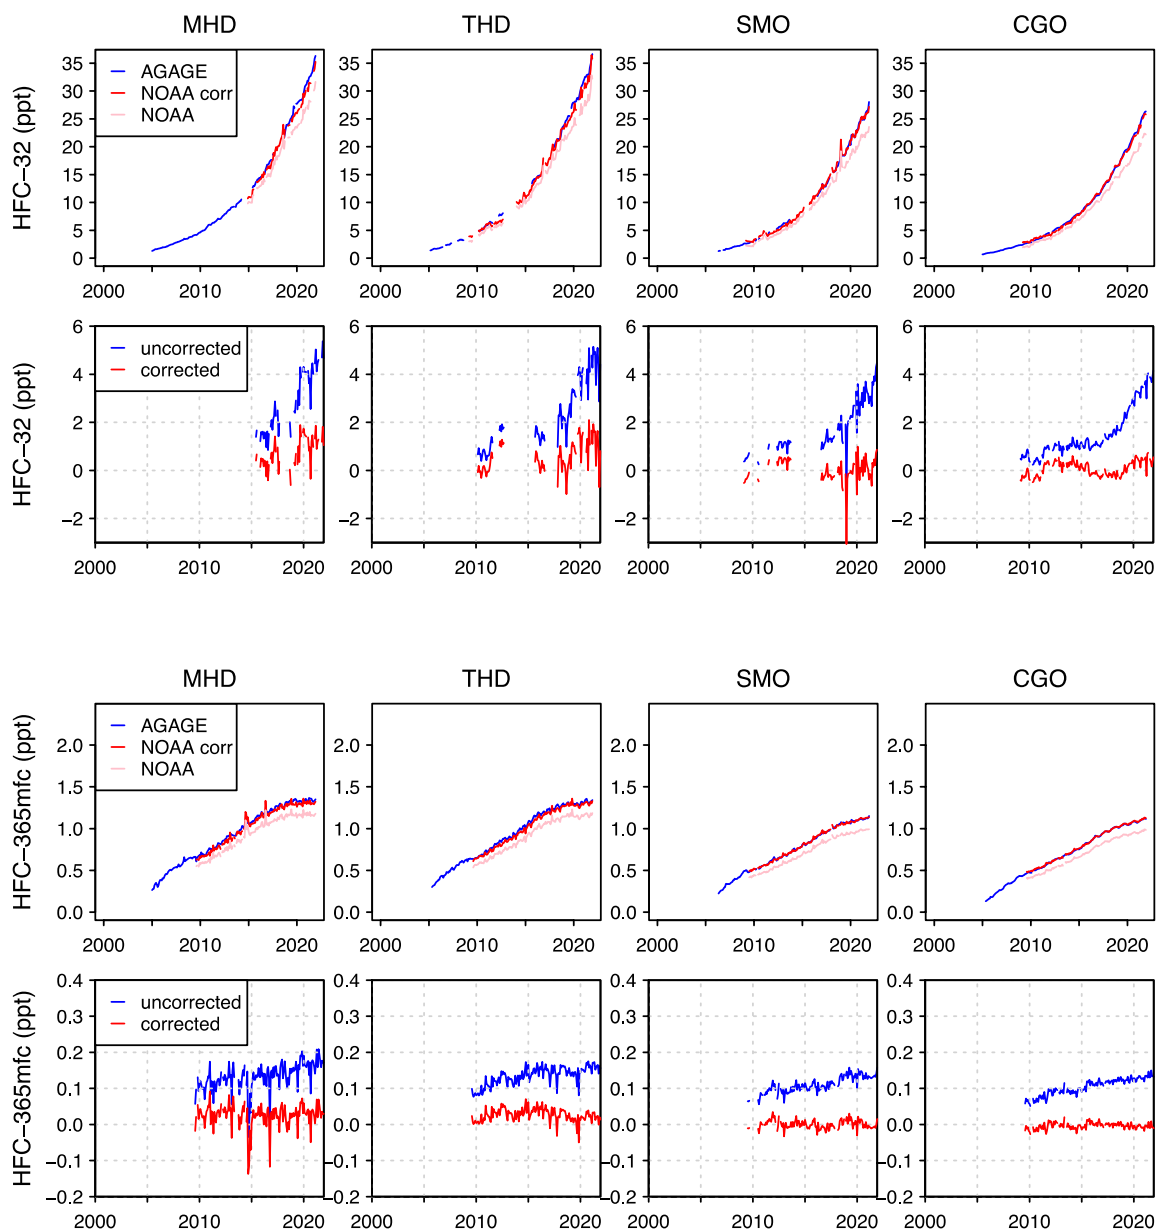

**Figure S2:** Monthly mean mole fractions in each latitudinal box in the lower troposphere calculated as the mean of all sites in each box: a) HFC-134a, b) HFC-152a, c) HFC-365mfc, d) HFC-245fa, and e) HFC-32. These are the observation data that were assimilated in the inversions.

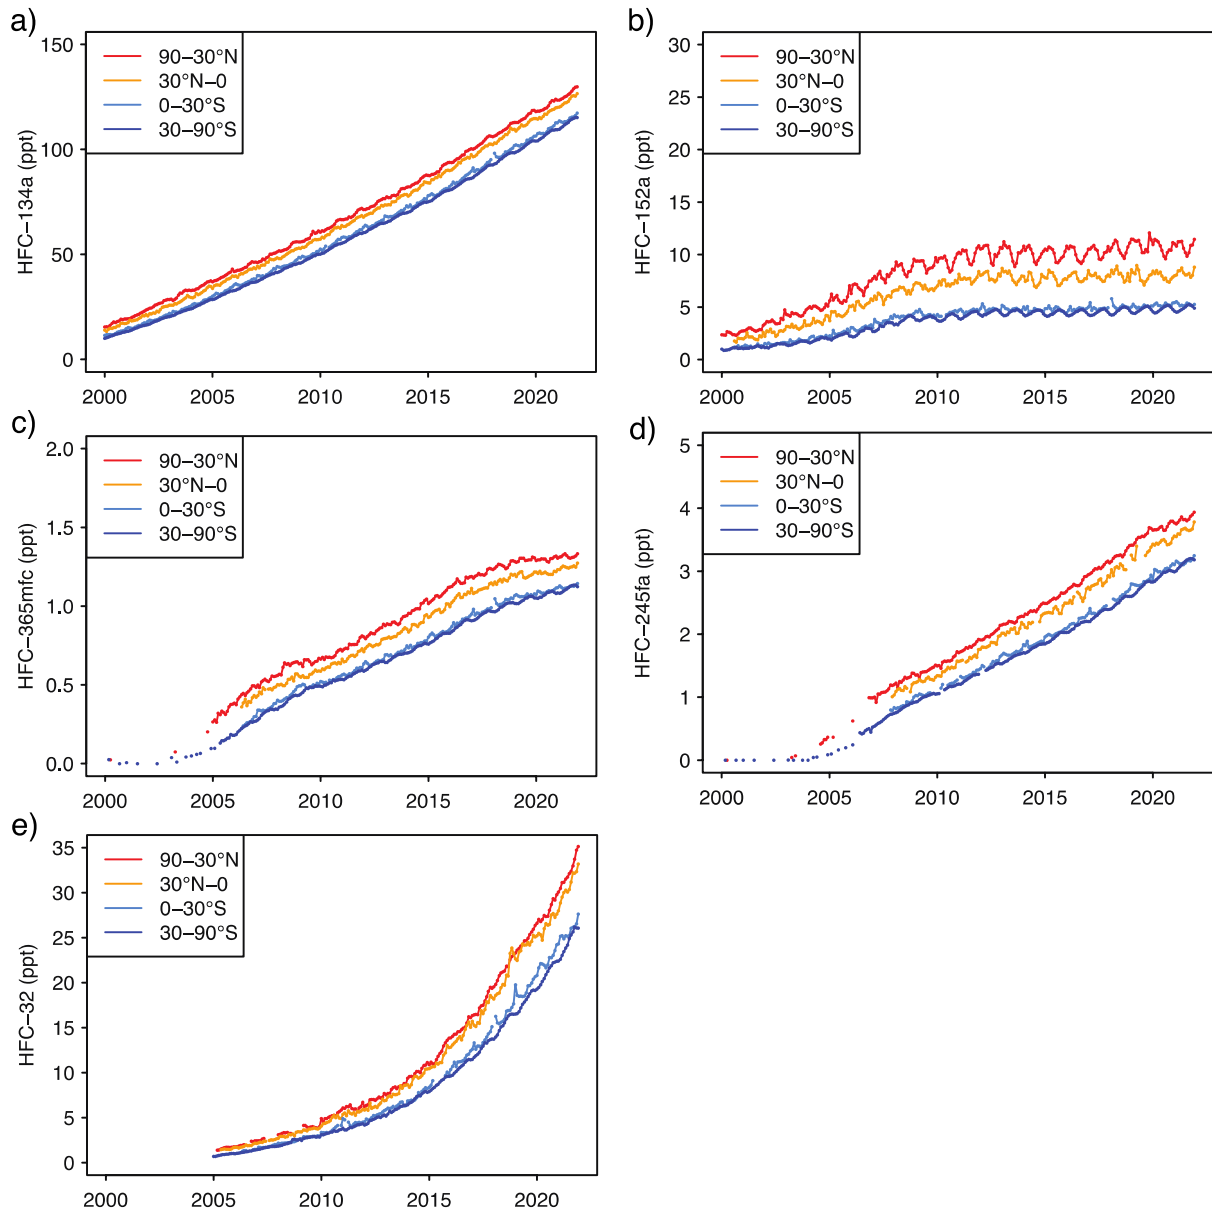



**Figure S3:** Dependence of the posterior emissions (top) and OH (bottom) on the choice of uncertainty. Results are shown for the inversion using HFC-134a, HFC-152a, and HFC-365mfc.

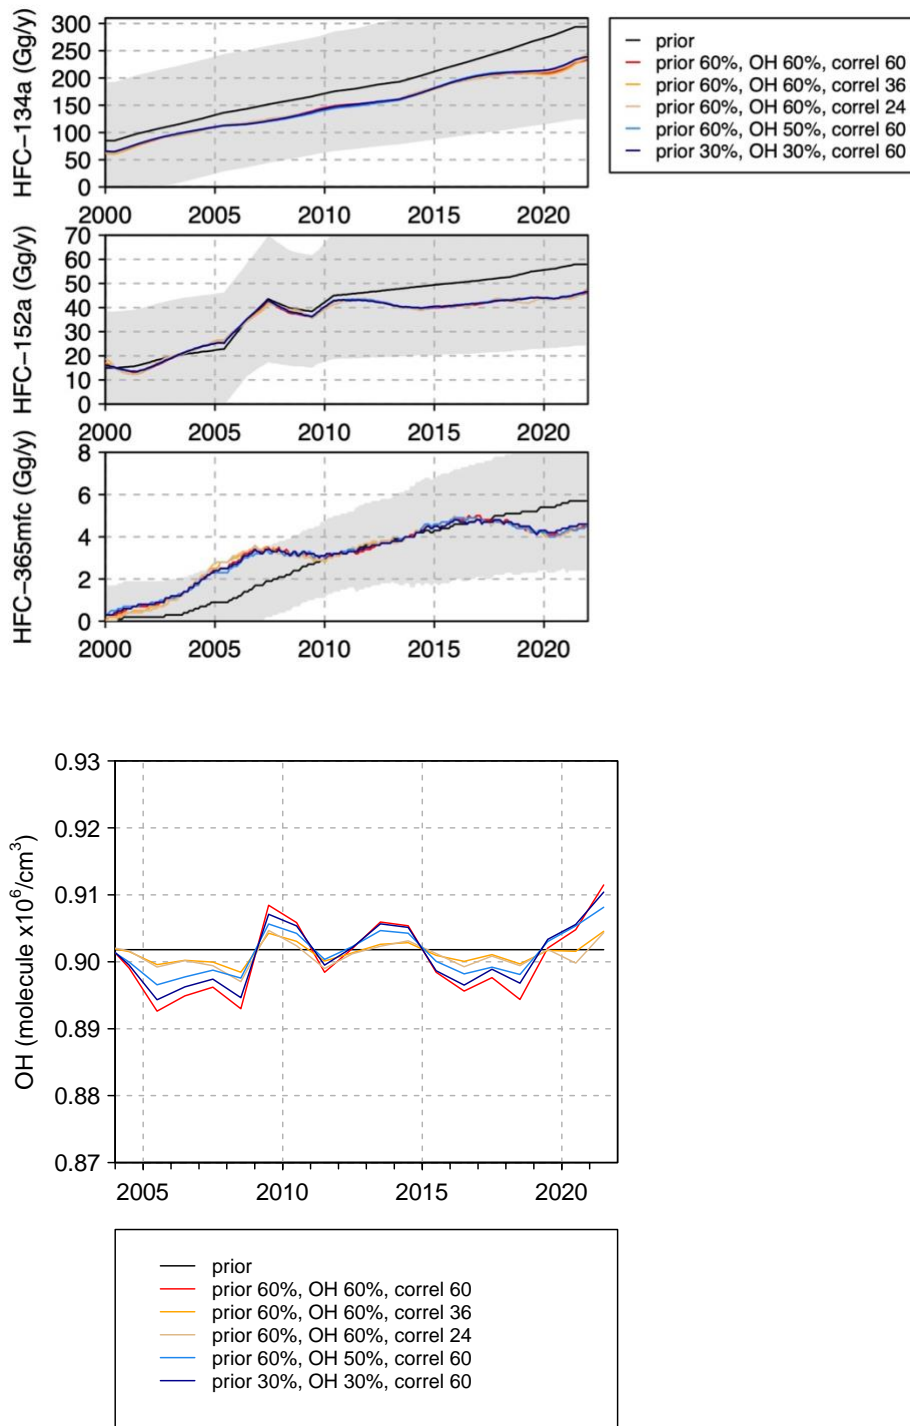

**Figure S4:** Comparison of the prior, posterior and true OH concentrations in the synthetic data test using HFC-134a, HFC-152a and HFC-365mfc.

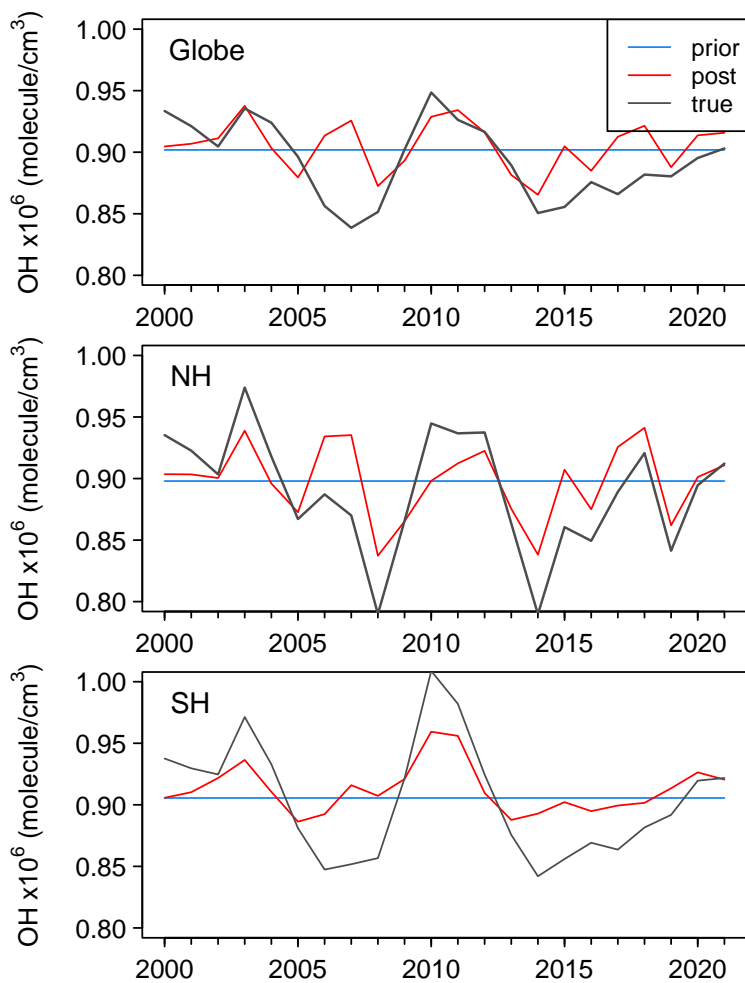

**Figure S5:** Timeseries of the model-observation error (ppt) for each of the five species used in this study. The black line is the error a priori and the coloured lines are the results from each of the six inversions that included the respective species (see legend).

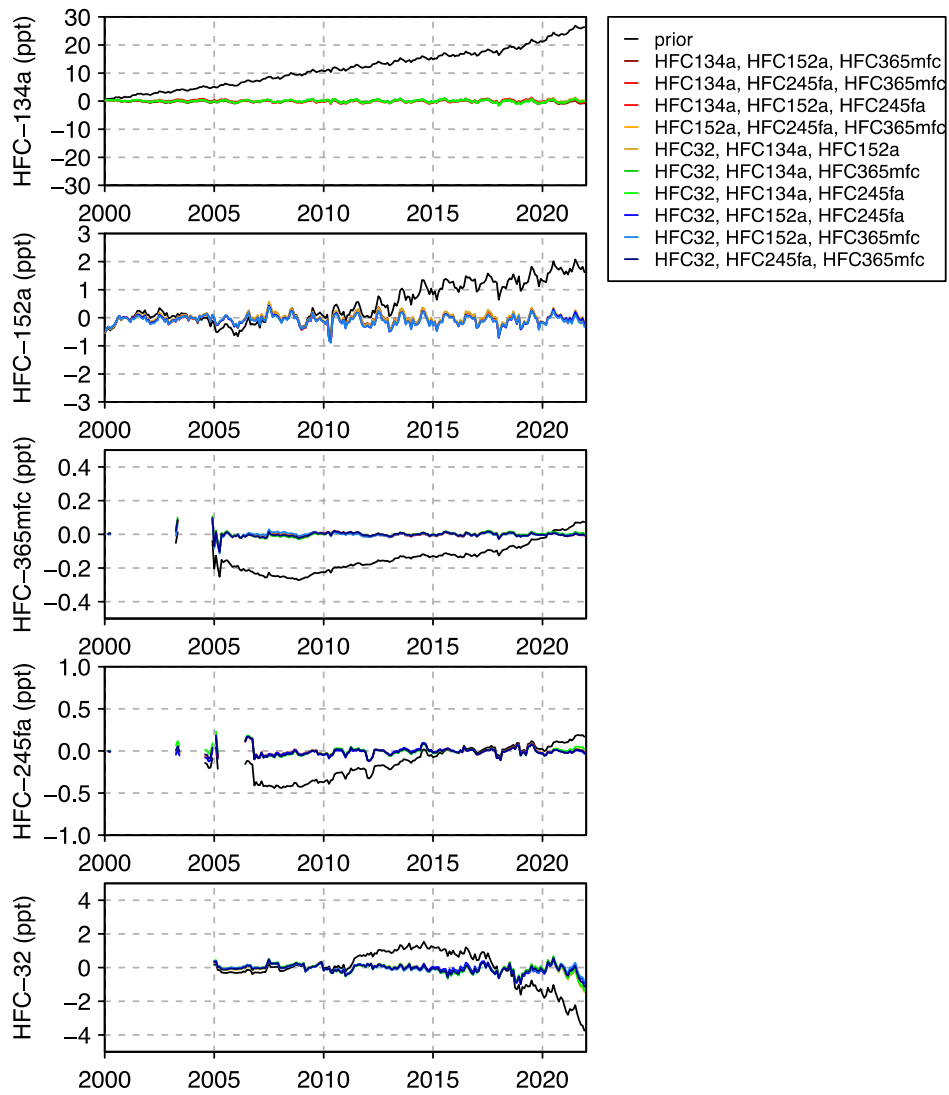

**Figure S6:** Timeseries of monthly global mean emissions (Gt/y). The black line is the prior with the prior uncertainty indicated by the grey shading. The coloured lines are the posterior emissions from the six inversions that included the respective species (see legend).

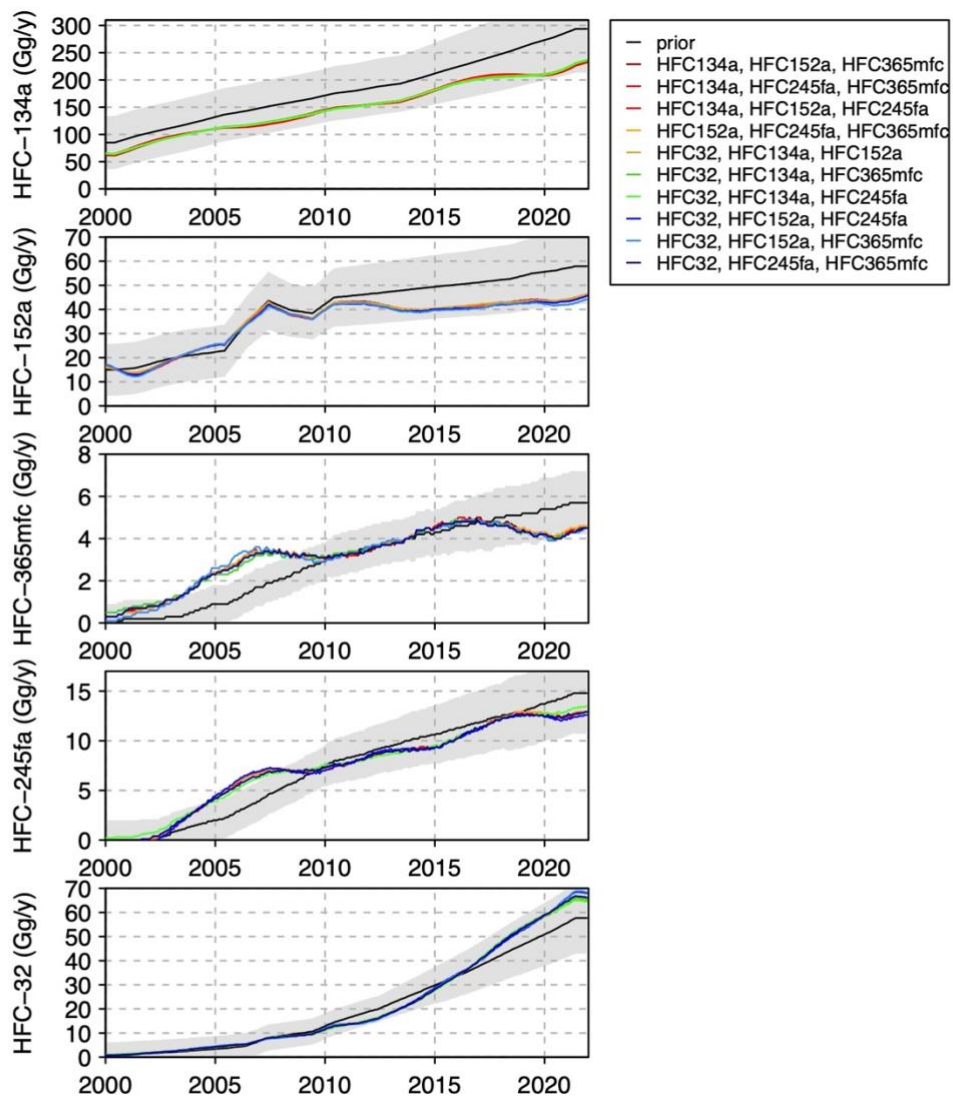

**Figure S7.** Time series of the global annual mean OH concentration shown for 2004-2021 from all 10 inversions in which NOAA data for HFC-32 and HFC-365mfc were adjusted to match the AGAGE scale.

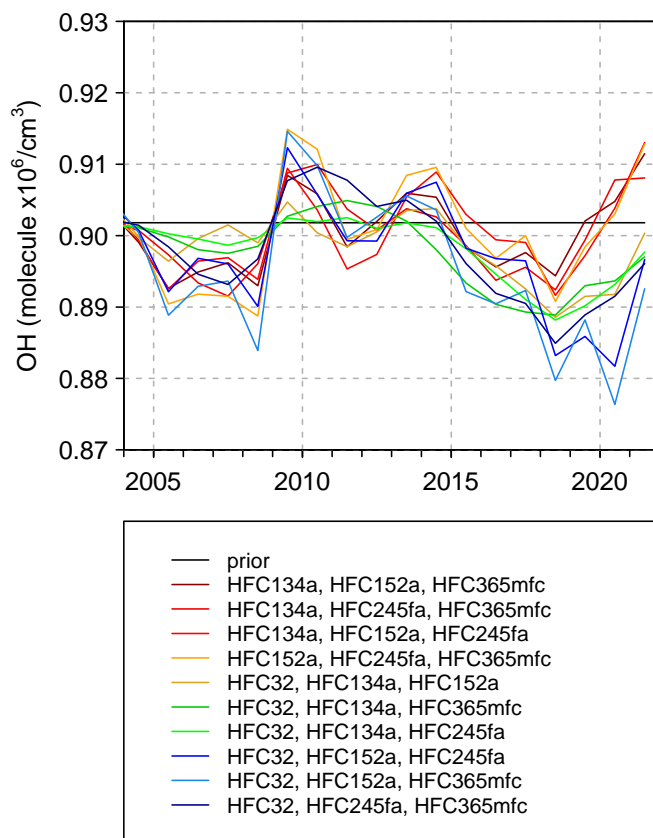

**Figure S8.** Monthly mean  $\text{CH}_4$  mole fractions in each latitudinal box in the lower troposphere calculated as the mean of all sites in each box. These are the observation data that were assimilated in the  $\text{CH}_4$  inversions.

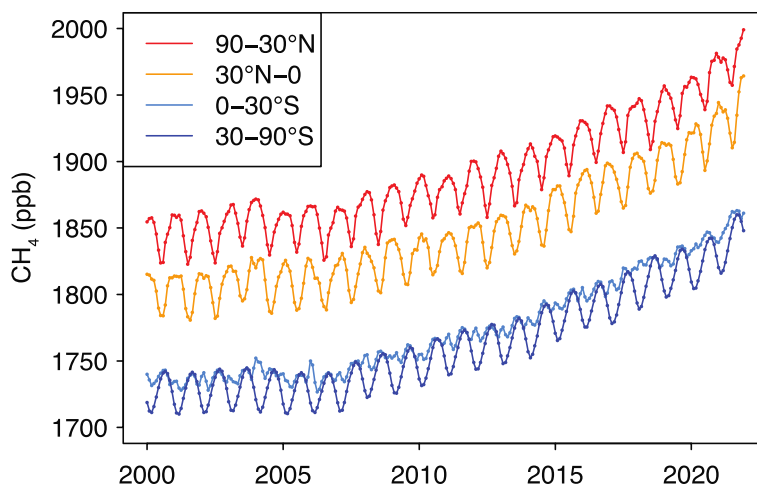

## References

Mellouki, A., Téton, S., and Bras, G. L.: Rate constant for the reaction of OH radical with HFC-365mfc (CF<sub>3</sub>CH<sub>2</sub>CF<sub>2</sub>CH<sub>3</sub>), *Geophys Res Lett*, <https://doi.org/10.1029/94gl03275>, 1995.

Orkin, V. L., Huie, R. E., and Kurylo, M. J.: Atmospheric Lifetimes of HFC-143a and HFC-245fa: Flash Photolysis Resonance Fluorescence Measurements of the OH Reaction Rate Constants, *J Phys Chem*, 100, 8907–8912, <https://doi.org/10.1021/jp9601882>, 1996.

Wilson, E. W., Hamilton, W. A., Mount, H. R., and DeMore, W. B.: Rate Constants for the Reactions of Hydroxyl Radical with Several Fluoroethers by the Relative Rate Method, *J Phys Chem*, 111, 1610–1617, <https://doi.org/10.1021/jp068355d>, 2007.
